# Supplementary material
Source: MDPI journal article supplement (https://www.mdpi.com/2673-4583/8/1/86)

Supplementary information for

***Greener Synthesis, In-silico and theoretical analysis of hydrazides as potential antituberculosis agents  
(Part 1)***

**Experimental details:**

**Materials and methods**

All the aldehydes were purchased from Sigma-Aldrich. NMR spectra were recorded on a Bruker-400 MHz NMR spectrometer. Column chromatography was performed using silica gel (100-200 mesh) purchased from SRL, India and mixtures of hexane-ethyl acetate were used for elution. TLC was carried out using Merck Silica Gel 60/UV254 either by UV fluorescence or by iodine chamber.

**1. Characterization of Chitosan Catalyst**

**XRD Analysis**

The XRD pattern of the as prepared chitosan hydrochloride ( Figure-6) appeared four peak at  $2\theta$  value 8.5, 12.6, 15.8, 18.5 and 24.0°.

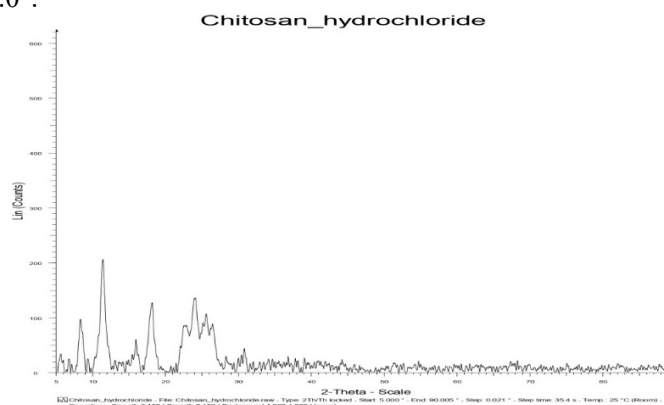

SI. Figure 1 - XRD Analysis of Chitosan Hydrochloride

**FTIR Analysis**

The FT-IR spectra of chitosan hydrochloride are shown in (SI Figure -2). The following peaks were observed in the FT-IR spectrum of chitosan hydrochloride. The peak at  $3312\text{ cm}^{-1}$  indicates the broad vibration of O–H band. The peaks appeared at 2921, 1624, 1520, confirmed the presence of C-H stretching, C=O group in amide respectively. Peaks appeared at 1377 and  $1312\text{ cm}^{-1}$  indicating  $\text{CH}_2$  bending and peaks appeared at 1146, 1050, 901 indicating C–O stretching, respectively.

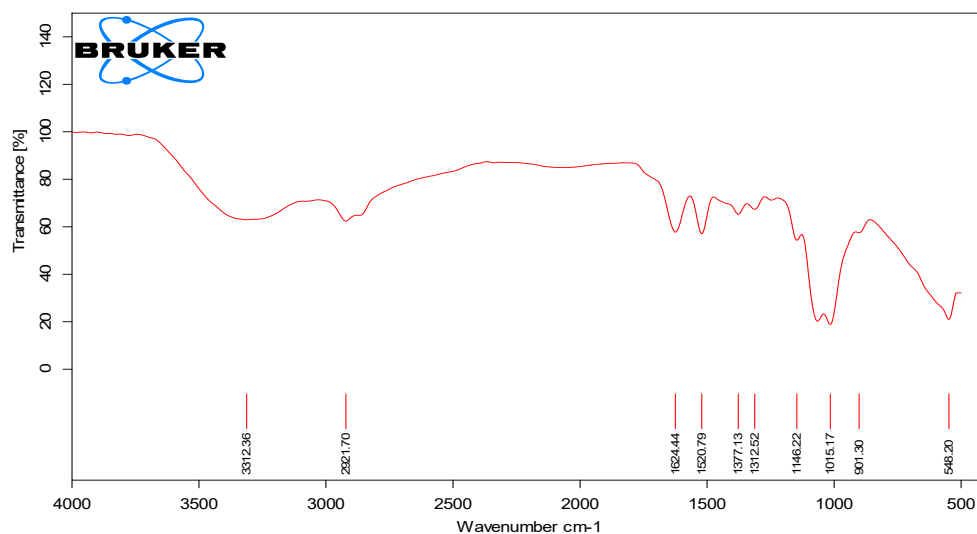

SI. Figure 2 - FTIR Analysis of Chitosan Hydrochloride.

**FT-IR spectra of (E)-N'-(2-((2-chlorobenzyl)oxy)benzylidene)-2-phenylacetohydrazide (3a):**

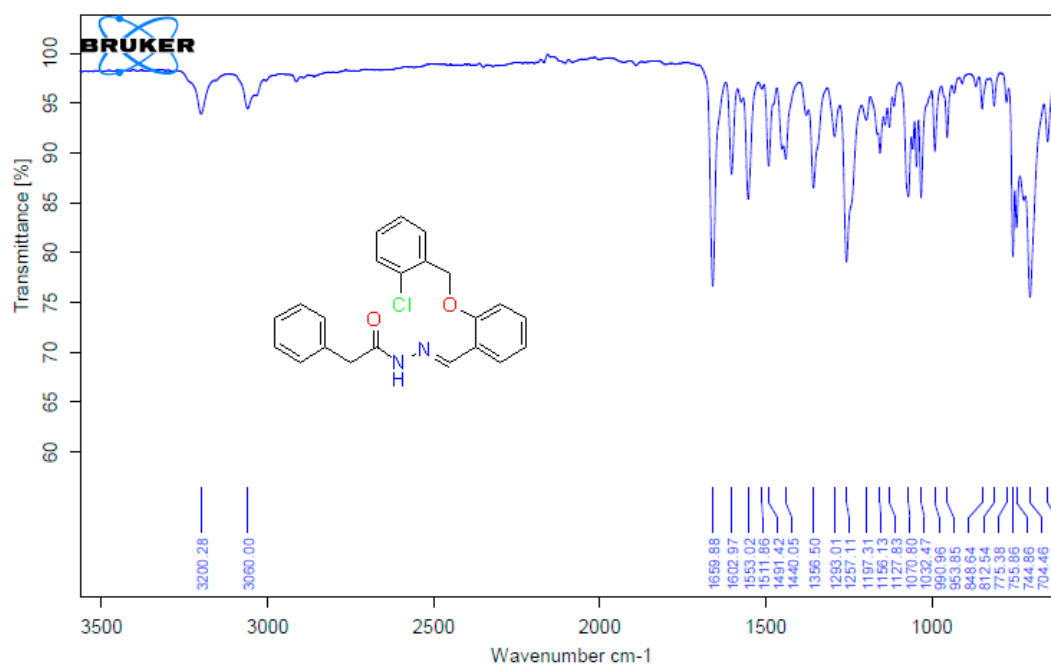

**<sup>1</sup>H-NMR spectra of (E)-N'-(2-((2-chlorobenzyl)oxy)benzylidene)-2-phenylacetohydrazide (3a):**

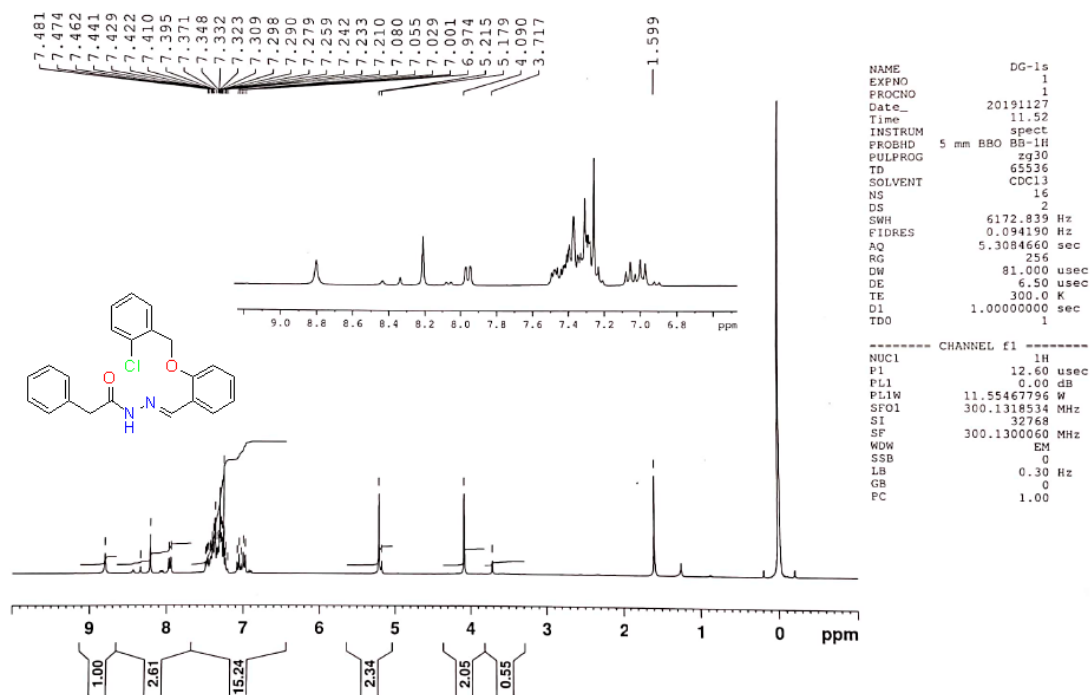

FT-IR spectra of (E)-N'-(4-((2-chlorobenzyl)oxy)-3-methoxybenzylidene)-2-phenylacetohydrazide (3b)

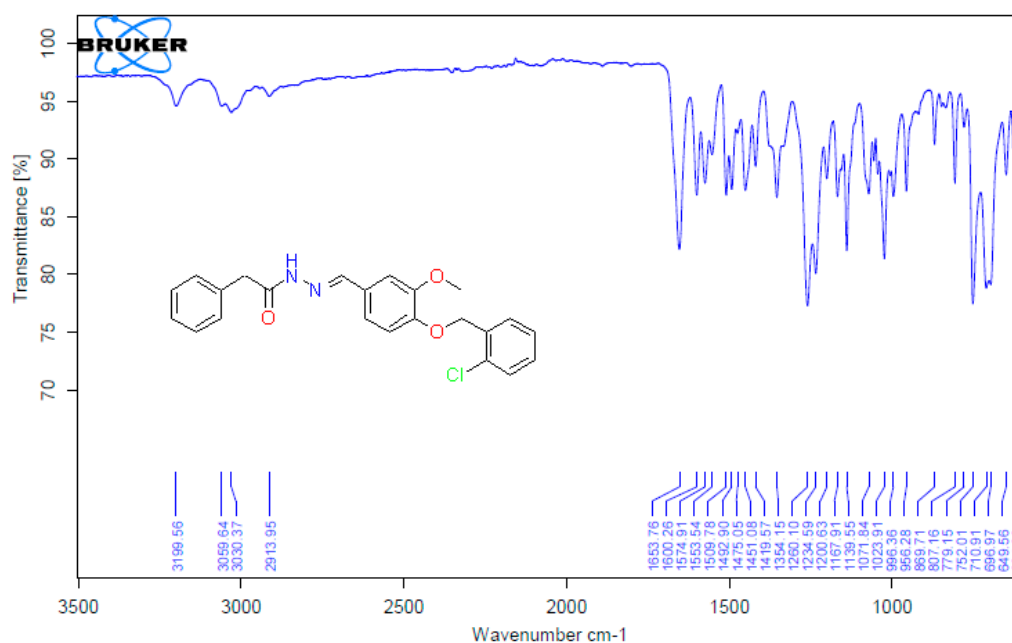

<sup>1</sup>H-NMR spectra of (E)-N'-(4-((2-chlorobenzyl)oxy)-3-methoxybenzylidene)-2-phenylacetohydrazide (3b):

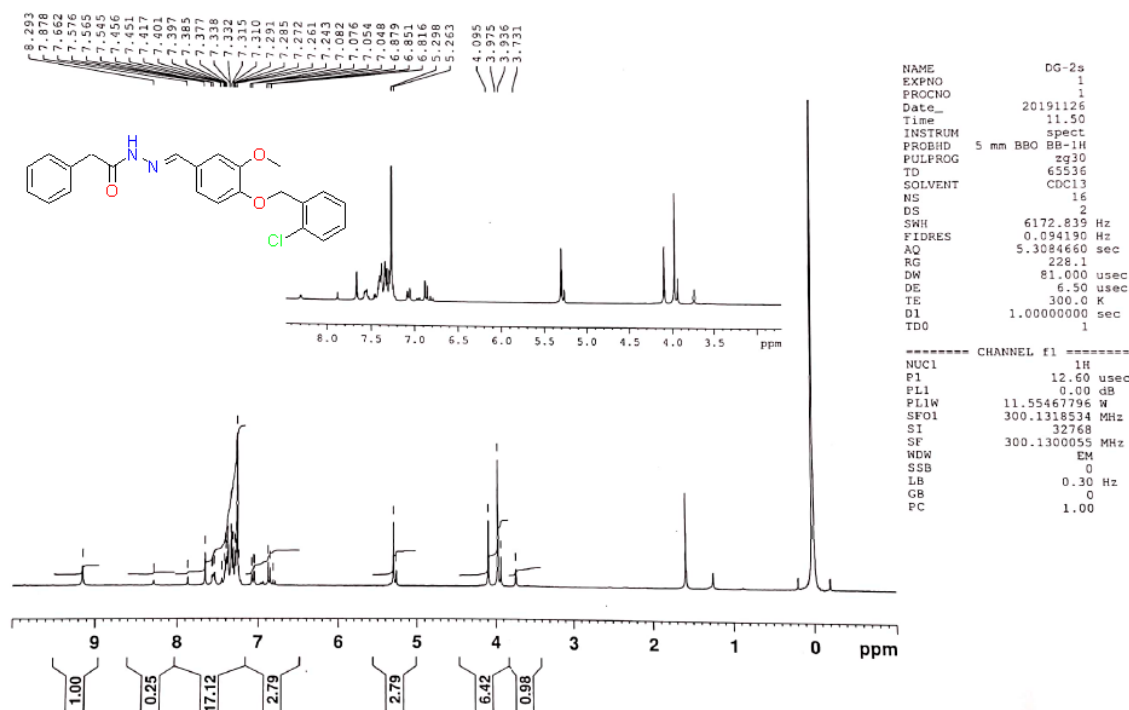

FT-IR spectra of methyl (E)-2-(2-methoxy-4-((2-(2-phenylacetyl)hydrazono)methyl)phenoxy)acetate (3c)

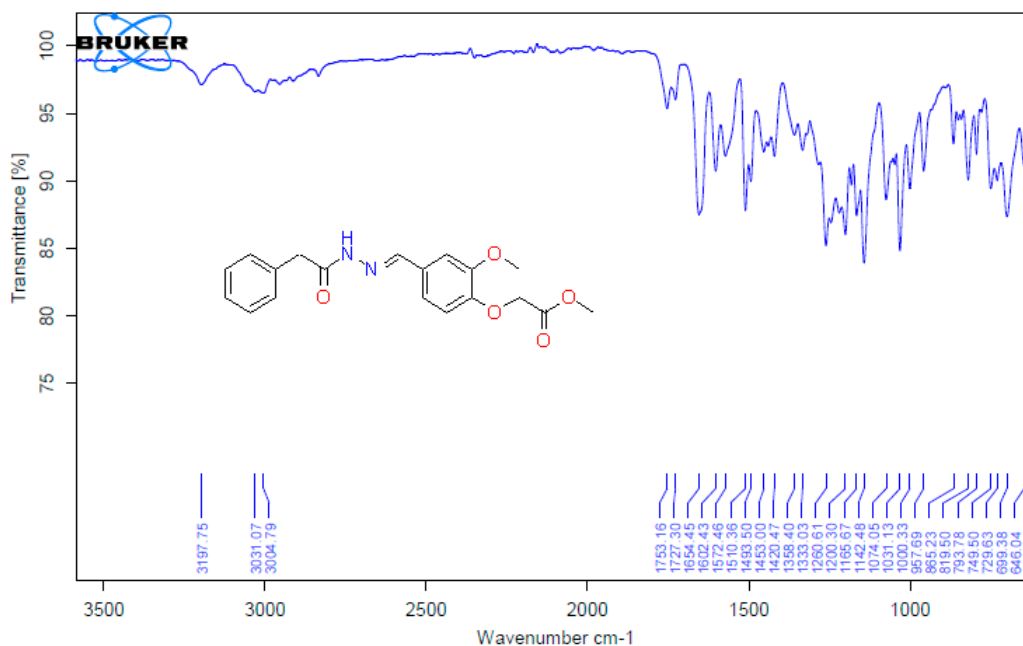

<sup>1</sup>H-NMR spectra of methyl (E)-2-(2-methoxy-4-((2-(2-phenylacetyl)hydrazono)methyl)phenoxy)acetate (3c):

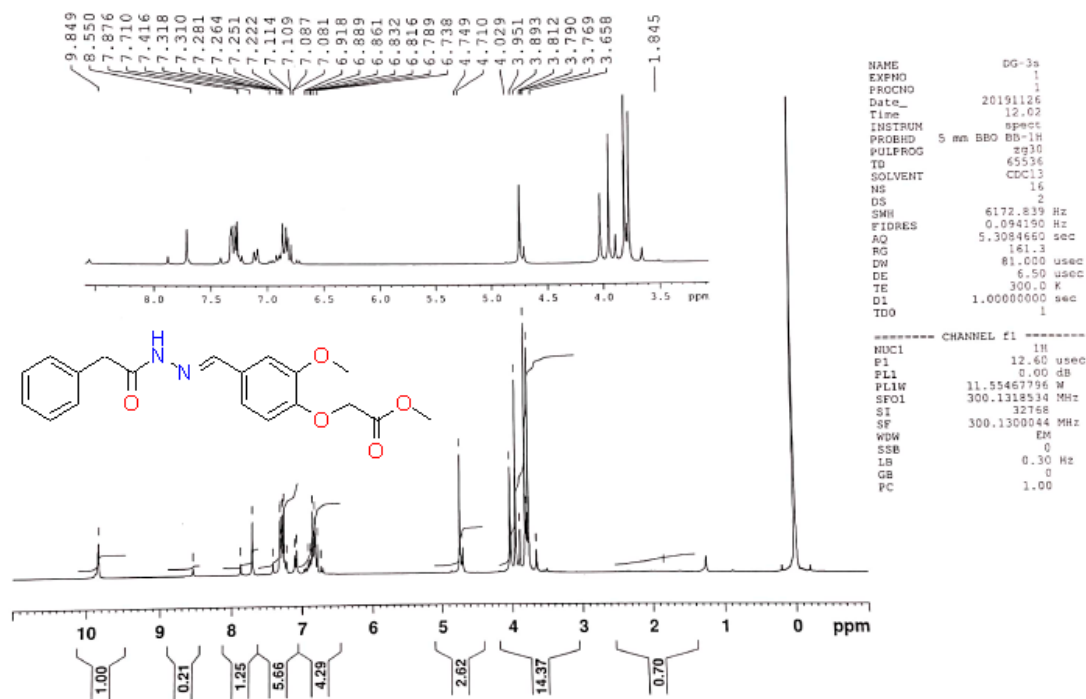

**FT-IR spectra of (E)-N'-(4-(allyloxy)-3-methoxybenzylidene)-2-phenylacetohydrazide (3d):**

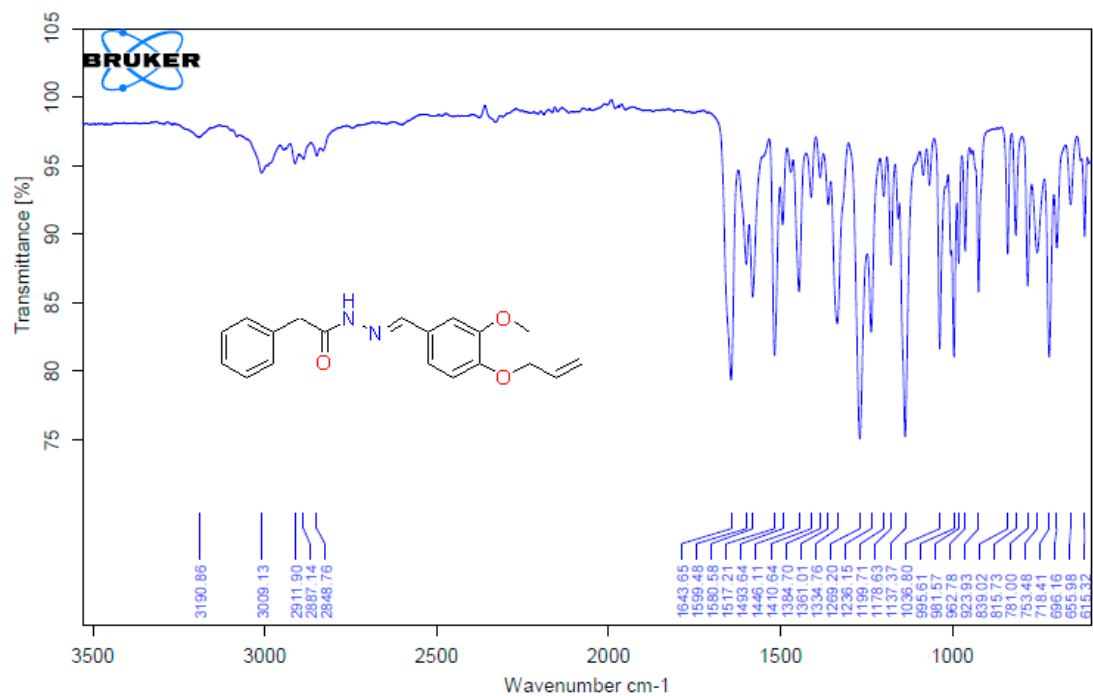

**<sup>1</sup>H-NMR spectra of (E)-N'-(4-(allyloxy)-3-methoxybenzylidene)-2-phenylacetohydrazide (3d):**

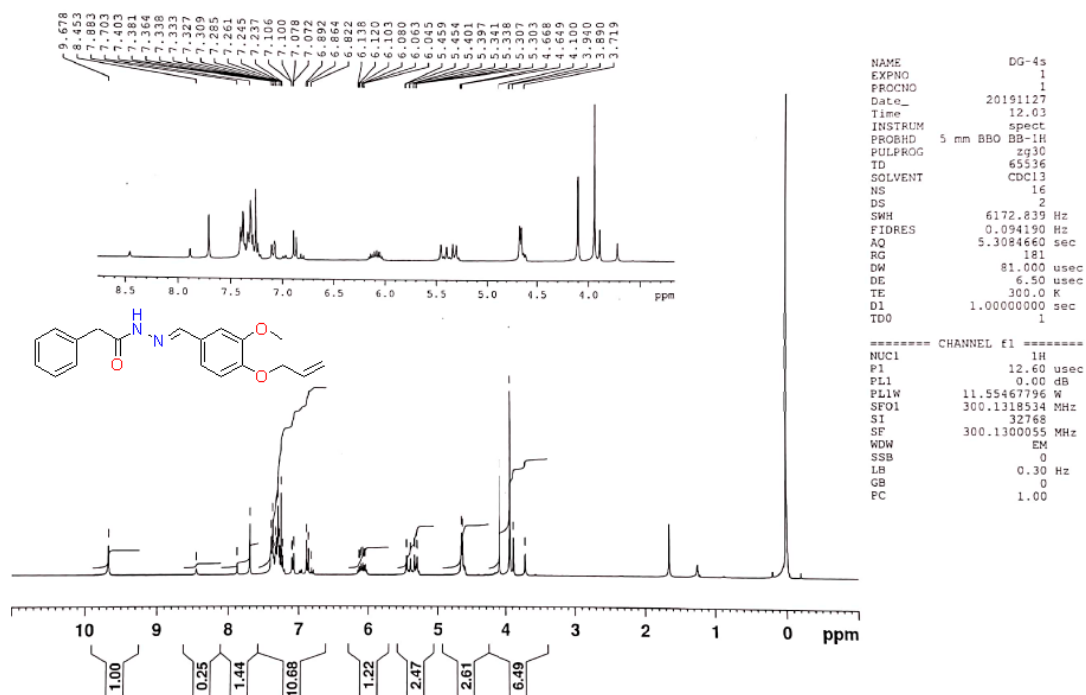

**FT-IR spectra of isopropyl (E)-2-(2-methoxy-4-((2-(2-phenylacetyl)hydrazono)methyl)phenoxy)acetate (3e):**

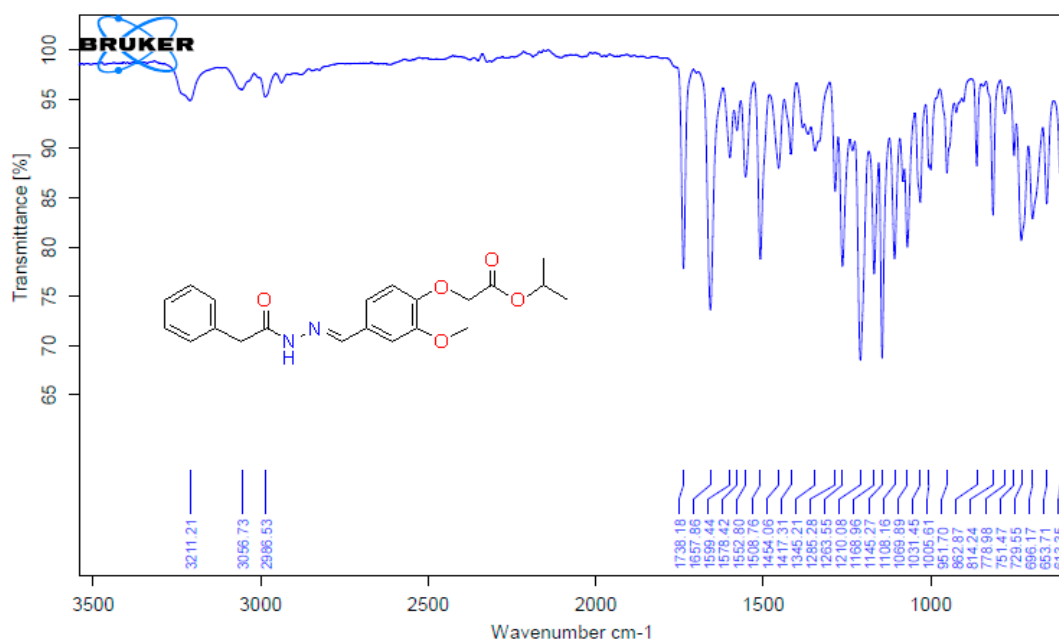

**<sup>1</sup>H-NMR spectra of isopropyl (E)-2-(2-methoxy-4-((2-(2-phenylacetyl)hydrazono)methyl)phenoxy)acetate (3e):**

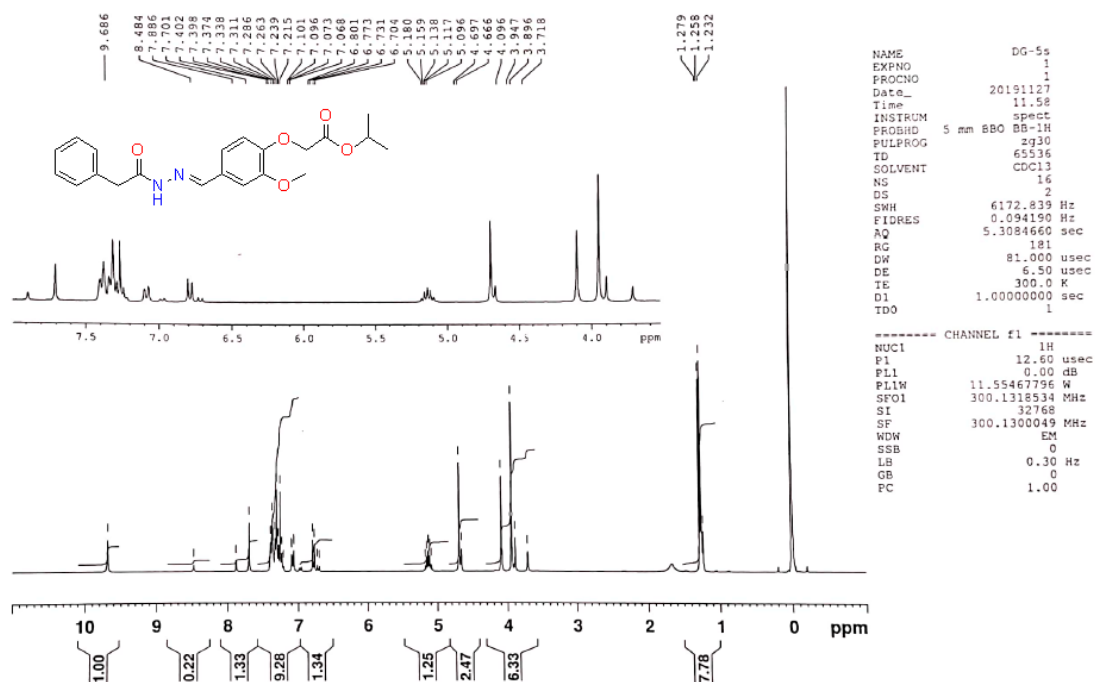

**NMR spectra of (E)-N'-(4-(benzyloxy)-3-methoxybenzylidene)benzohydrazide (3f):**

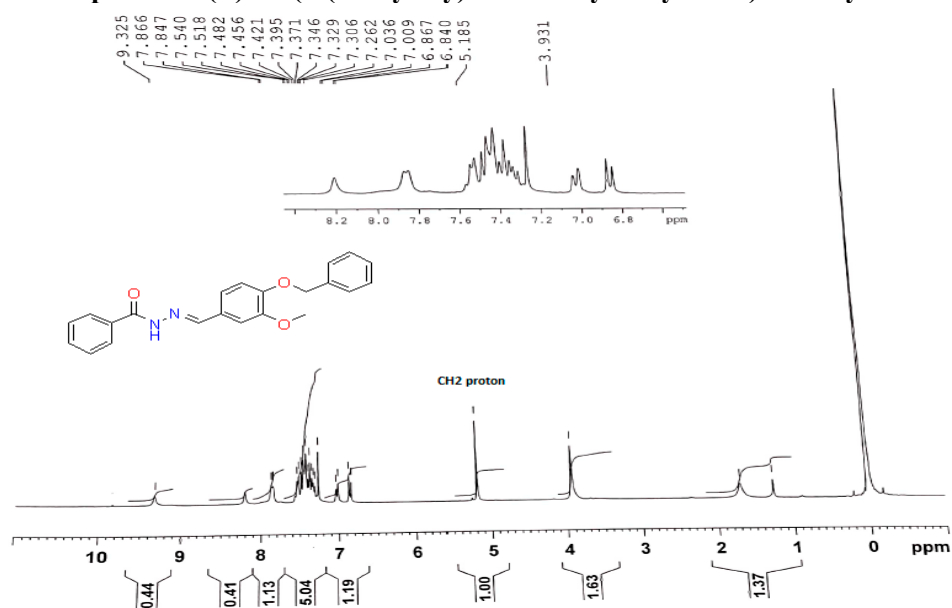

**NMR spectra of (E)-4-((2-benzoylhydrazono)methyl)-2-methoxyphenyl acetate (3g):**

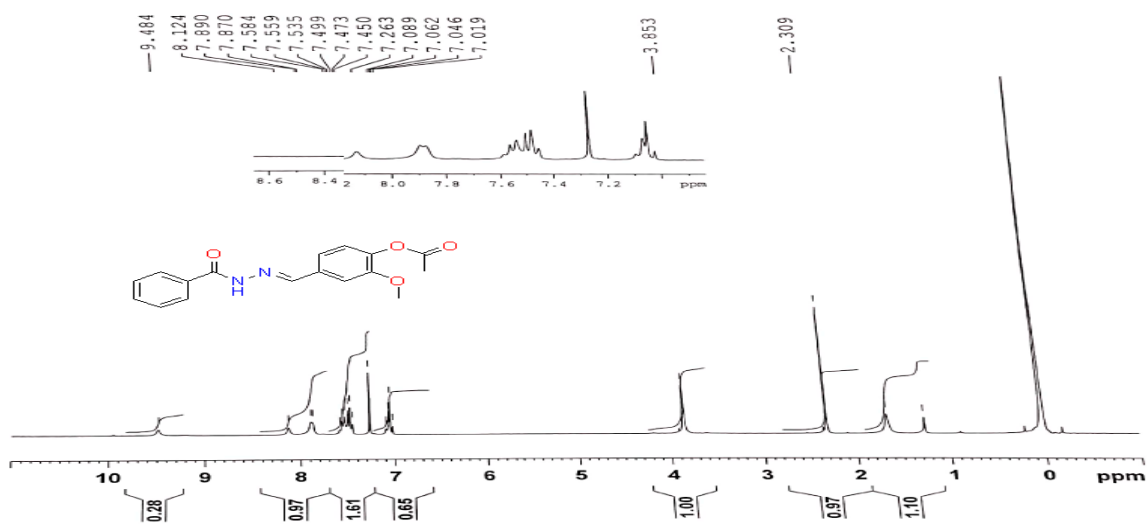

**NMR spectra of methyl (E)-2-(4-((2-benzoylhydrazono)methyl)phenoxy)acetate (3h):**

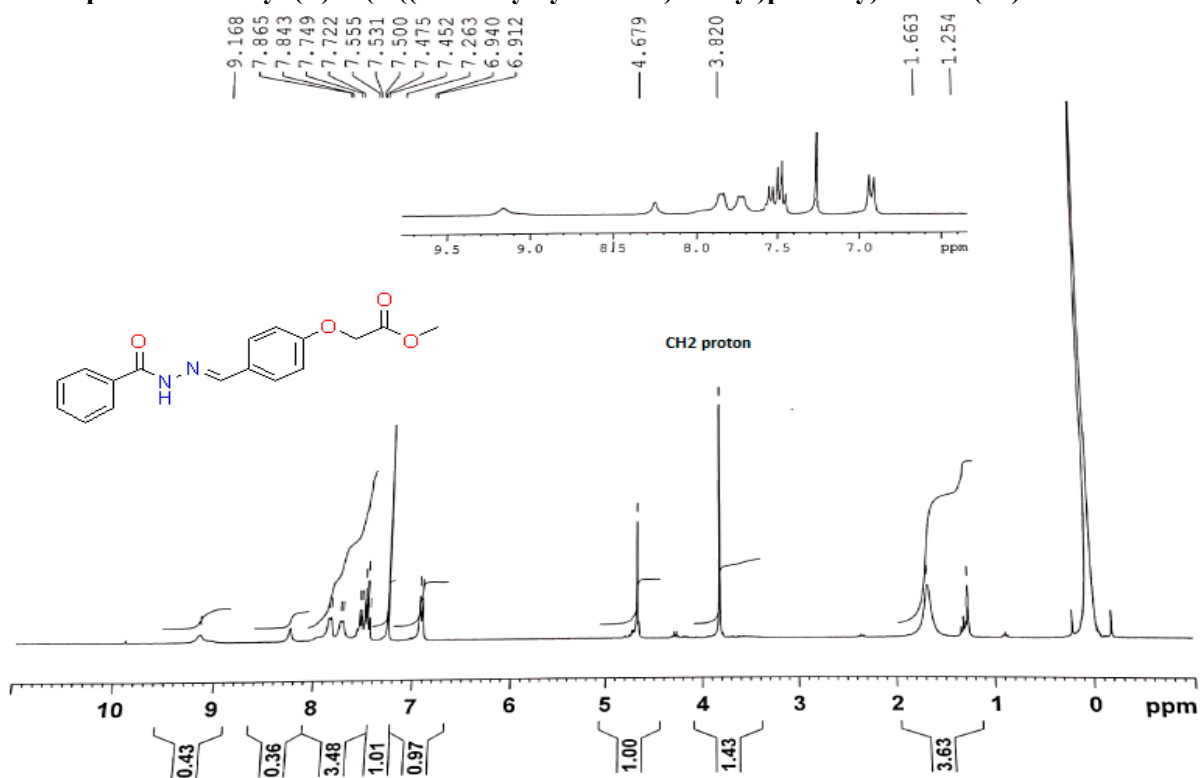

**NMR spectra of (E)-N'-(4-((2-chlorobenzyl)oxy)benzylidene)benzohydrazide (3i):**

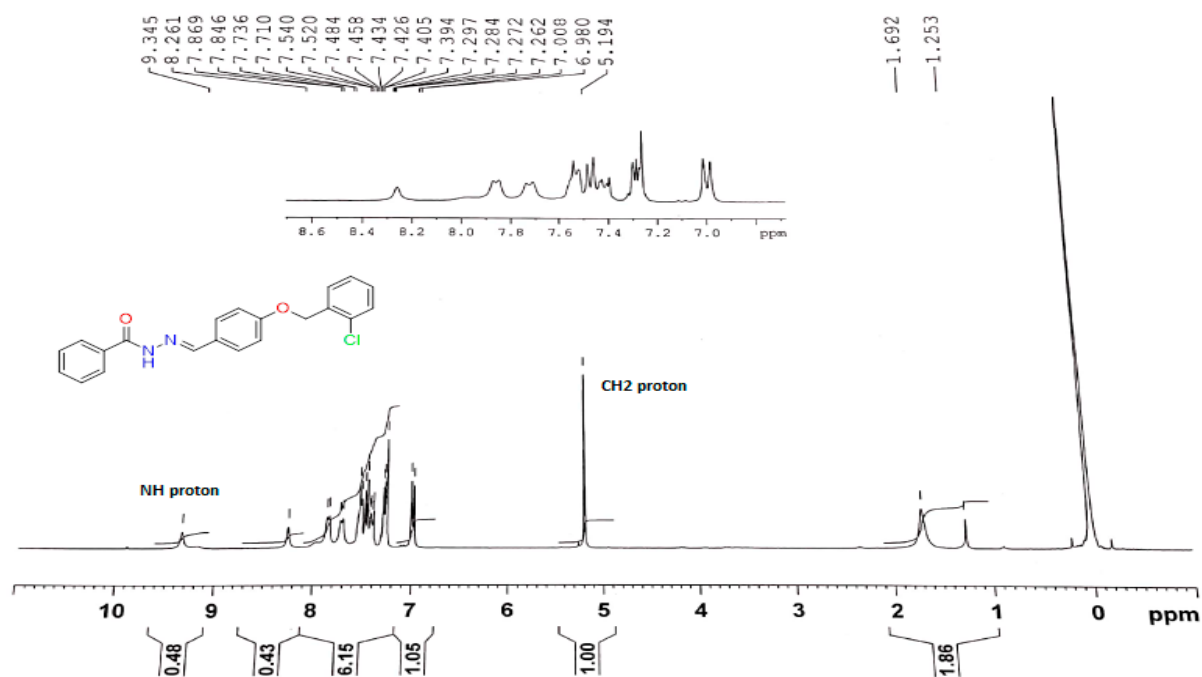

**NMR spectra of (E)-N'-(4-(3-methoxypropoxy)benzylidene)benzohydrazide (3j):**

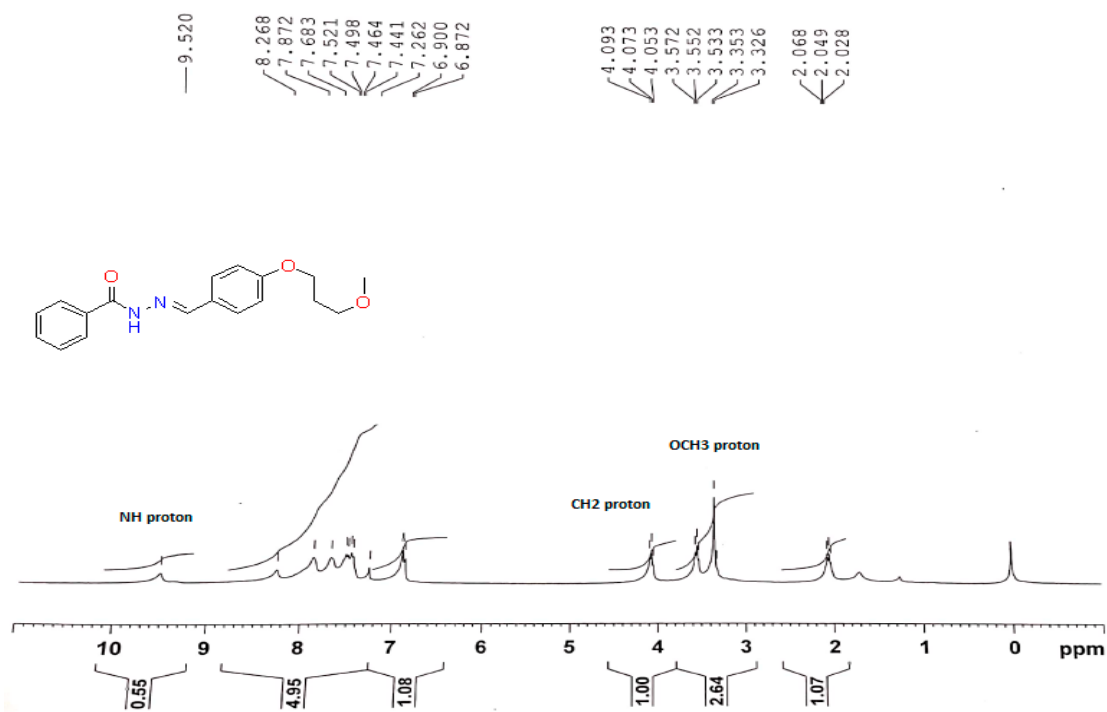

Supplement: s1 [file s1 › chemproc-1709726-supplementary.pdf]
